# Supplementary material
Source: ML conference proceedings conference paper supplement (https://openaccess.thecvf.com/content/WACV2024/html/Jang_Lost_Your_Style_WACV_2024_paper.html)

## Appendix B. User study 2: A/B test between the result of our model and the ground truth

The following figures are some actual examples of A/B tests in the user study conducted with Amazon Mechanical Turk, described in Section 4.5. The outfit sets highlighted in red boxes are the text-outfit retrieval results from our model, while the other outfit sets are the ground truth from the test set.

We aim to search for fashion outfits using text. Below are the outfit results based on the provided text. Please choose which recommended result (outfit A or outfit B) you think is better.

Text Query : sunshine monday blue.

Outfit A :

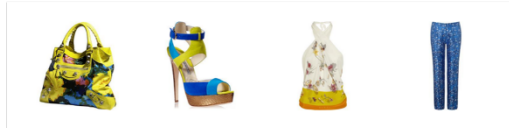

Outfit B :

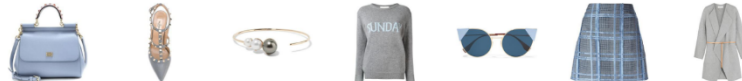

We aim to search for fashion outfits using text. Below are the outfit results based on the provided text. Please choose which recommended result (outfit A or outfit B) you think is better.

Text Query : disco night. Saturday Night

Outfit A :

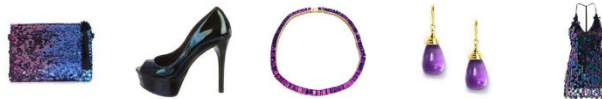

Outfit B :

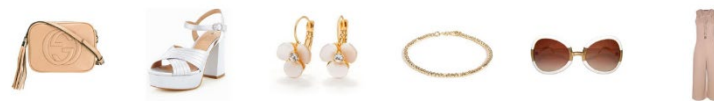

We aim to search for fashion outfits using text. Below are the outfit results based on the provided text. Please choose which recommended result (outfit A or outfit B) you think is better.

Text Query : winter urban chic. Winter Sunglasses

Outfit A :

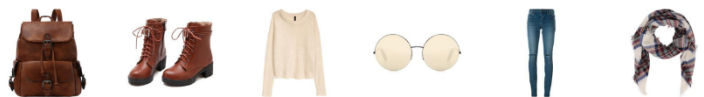

Outfit B :

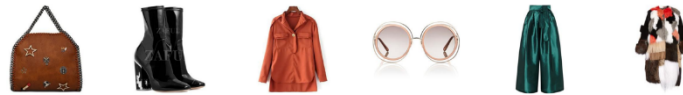

We aim to search for fashion outfits using text. Below are the outfit results based on the provided text. Please choose which recommended result (outfit A or outfit B) you think is better.

Text Query : denim trend black jeans. Biker Jeans

Outfit A :

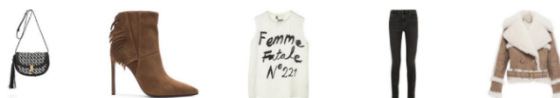

Outfit B :

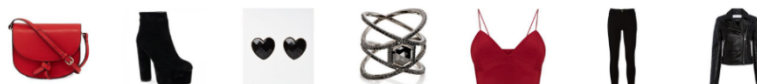

We aim to search for fashion outfits using text. Below are the outfit results based on the provided text. Please choose which recommended result (outfit A or outfit B) you think is better.

Text Query : summery blue. Summery Fedoras

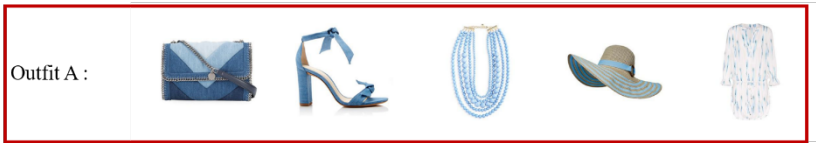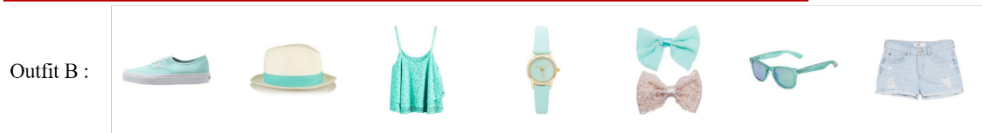

We aim to search for fashion outfits using text. Below are the outfit results based on the provided text. Please choose which recommended result (outfit A or outfit B) you think is better.

Text Query : Flea market Sunday outfit

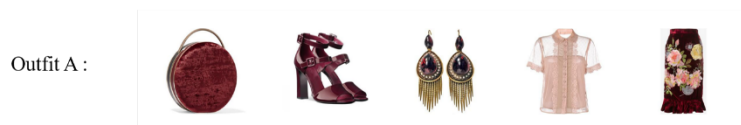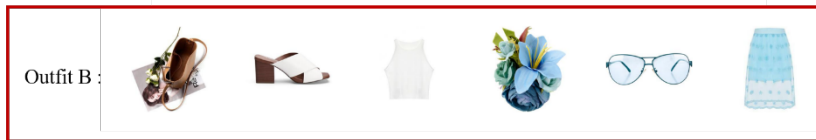

We aim to search for fashion outfits using text. Below are the outfit results based on the provided text. Please choose which recommended result (outfit A or outfit B) you think is better.

Text Query : Long Black Dresses outfit.

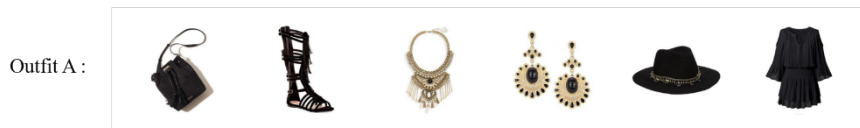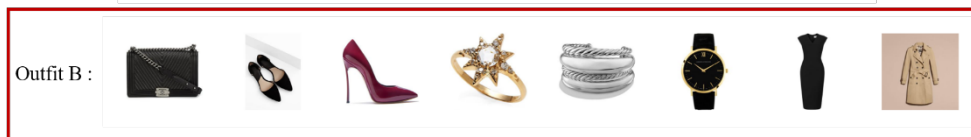

We aim to search for fashion outfits using text. Below are the outfit results based on the provided text. Please choose which recommended result (outfit A or outfit B) you think is better.

Text Query : plus size swimsuit.

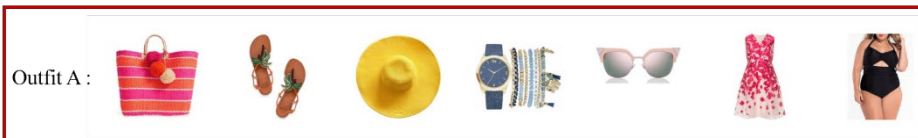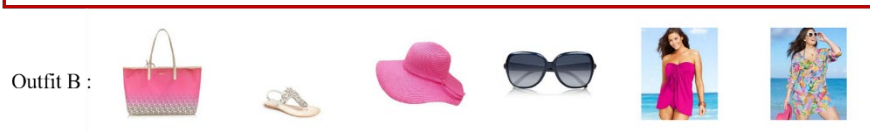

Supplement: Supplementary file 1 [file Jang_Lost_Your_Style_WACV_2024_supplemental.pdf]
